# Supplementary material for: Screen-printed supercapacitors based on vitamin B 2 functionalized carbon electrodes and deep eutectic solvent electrolytes
Source: Royal Society of Chemistry journal article supplement (doi:10.1039/d5ta05564d), 2025-11-25
Supplement: d5ta05564d2.pdf [file d5ta05564d2.pdf]

## Supporting information

### Screen-printed supercapacitors based on vitamin B<sub>2</sub> functionalized carbon electrodes and deep eutectic solvent electrolytes

Chirag Mevada<sup>a</sup>, Aapo Kattainen<sup>a</sup>, Vijay Singh Parihar<sup>b</sup>, Amit Tewari<sup>a</sup>, Jari Keskinen<sup>a</sup>,  
Minna Kellomäki<sup>b</sup>, Matti Mäntysalo<sup>a</sup>

<sup>a</sup>Faculty of Information Technology and Communication Sciences, Tampere University,  
Tampere, Finland

<sup>b</sup>Faculty of Medicine and Health Technology, Tampere University, Tampere, Finland

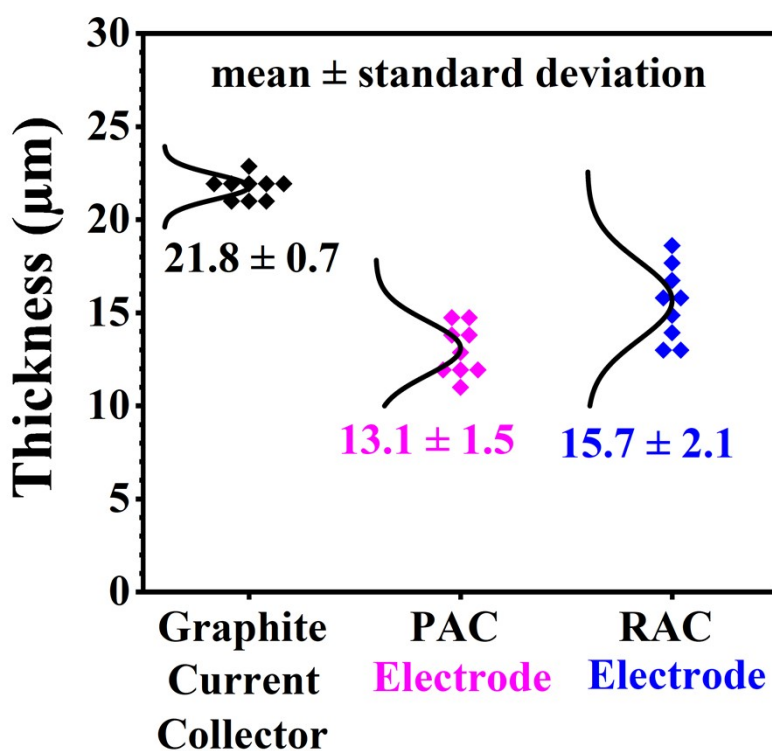

Fig. S1. Measurement of printed current collectors and electrodes thickness using a digital micrometer and the thickness was determined from multiple points across the printed area of the screen-printed current collector and electrodes layers.

**Table S1. Elemental composition (At%) of the PAC sample from XPS analysis**

| PAC             |          |      |       |
|-----------------|----------|------|-------|
| Element         | Position | FWHM | At%   |
| C 1s (C-C)      | 284.8    | 1.46 | 35.94 |
| C 1s(C-O)       | 285.95   | 1.46 | 21.69 |
| C 1s(C=O)       | 286.94   | 1.97 | 21.1  |
| C 1s(O=C-O)     | 289.48   | 3.13 | 9.78  |
| O 1s(C=O/O-C=O) | 533.4    | 3.16 | 6.75  |
| O 1s(C-O)       | 534.26   | 3.16 | 4.17  |
| O 1s(COOH)      | 535.22   | 3.16 | 0.57  |

**Table S2. Elemental composition (At%) of the RAC sample from XPS analysis**

| RAC         |          |      |       |
|-------------|----------|------|-------|
| Element     | Position | FWHM | At%   |
| C 1s(C-C)   | 284.8    | 1.66 | 30.74 |
| C 1s(C-O)   | 286.2    | 1.66 | 27.58 |
| C 1s(N-C=O) | 287.45   | 1.66 | 14.69 |
| C 1s(O=C-O) | 289.08   | 3.44 | 12.96 |
| N 1s        | 399.41   | 3.92 | 1.6   |
| O 1s(N-C=O) | 531.97   | 3.13 | 6.32  |
| O 1s(C-O)   | 533.58   | 3.13 | 5.17  |
| O 1s(COOH)  | 534.14   | 3.13 | 0.94  |

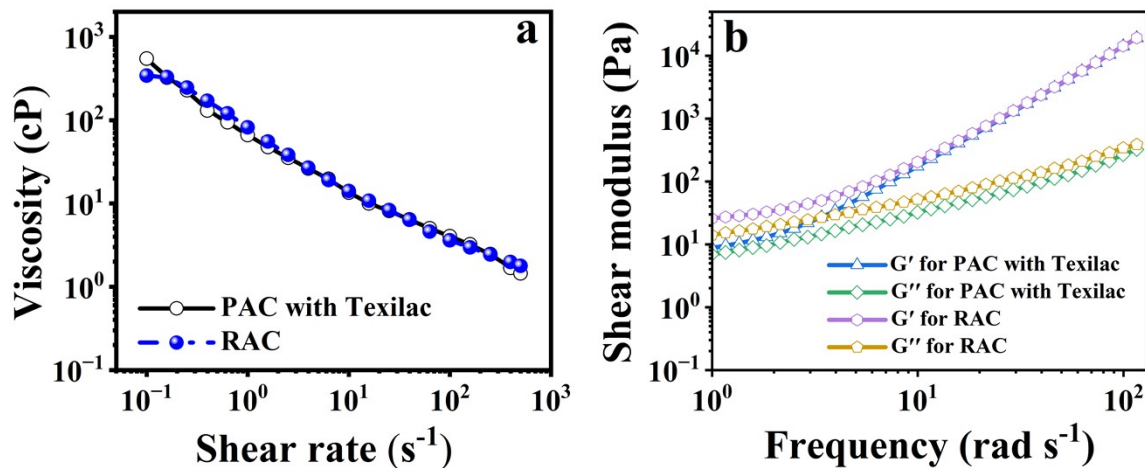

Fig. S2 (a) shows the variation in apparent viscosity of the electrode inks as a function of shear rate and (b) presents the dependence of their storage modulus ( $G'$ ) and loss modulus ( $G''$ ) on frequency.

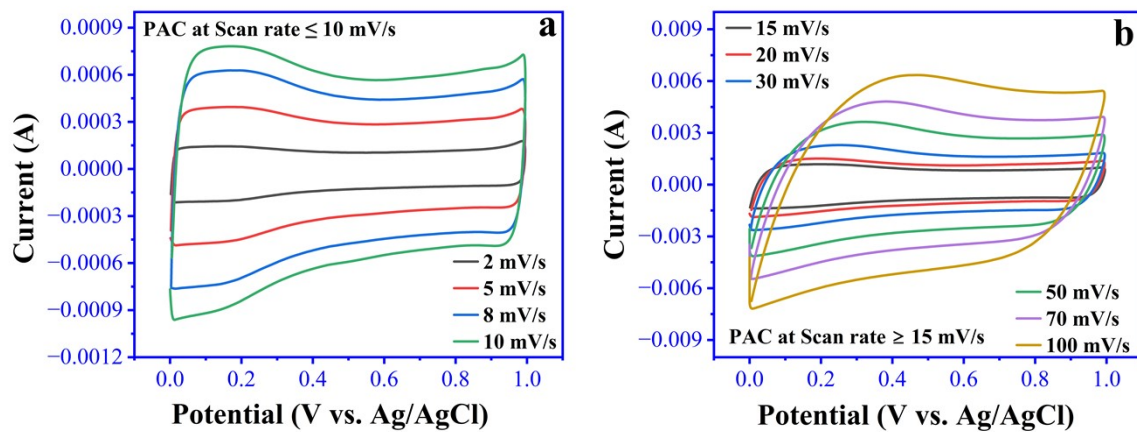

Fig. S3. Cyclic voltammetry curves at scan rates of (a)  $\leq 10$  mV/s and (b)  $\geq 15$  mV/s for PAC electrode.

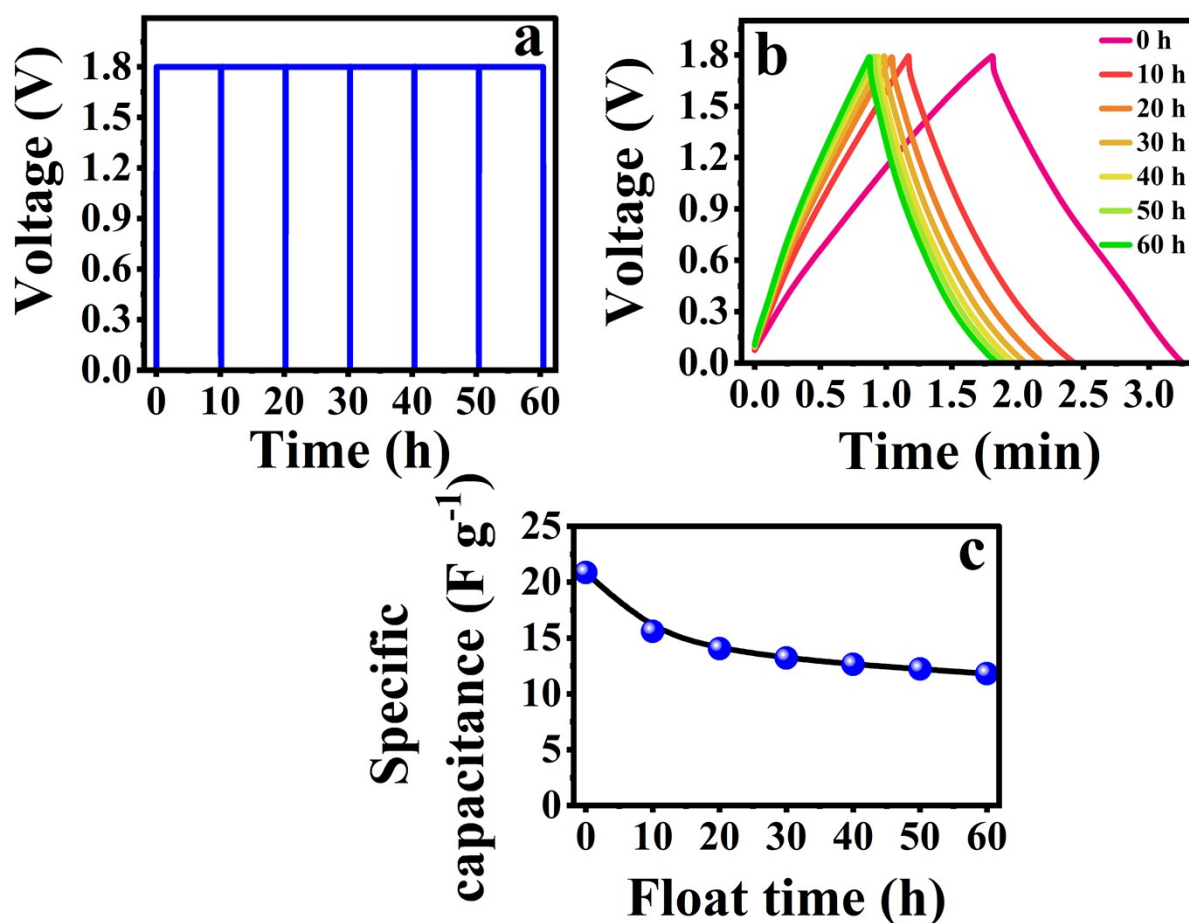

Fig. S4 (a) GCD profiles of the RAC device recorded over a floating duration of 0-60 h, (b) corresponding GCD curves obtained at 10 h intervals, and (c) variation in specific capacitance as a function of floating time.

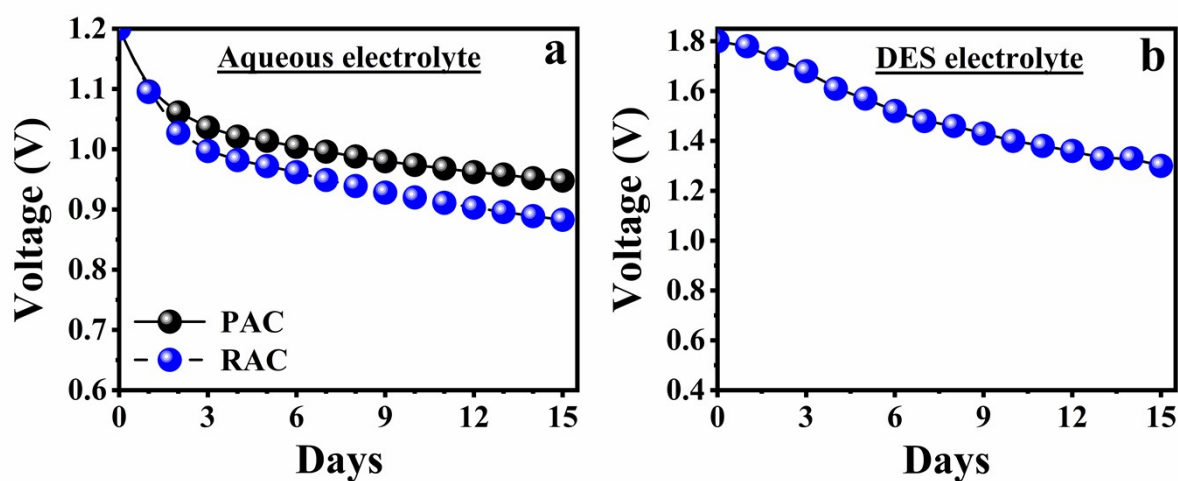

Fig. S5. Self-discharge behavior of the fabricated supercapacitors: (a) in aqueous electrolyte and (b) in deep eutectic solvent (DES) electrolyte.

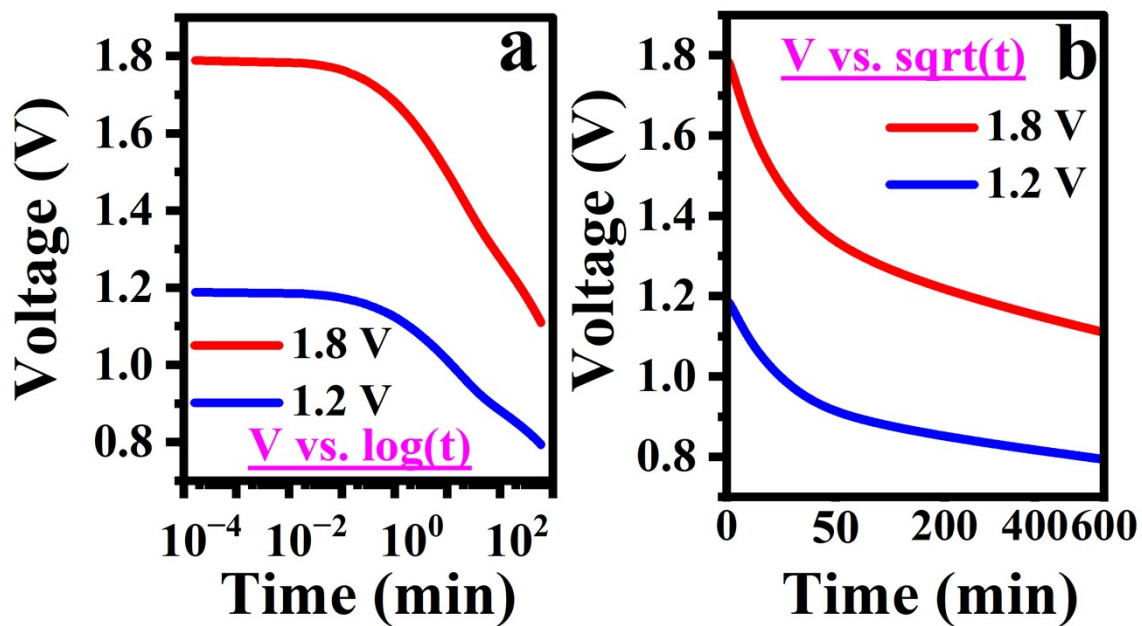

Fig. S6. Self-discharge profiles from 1.2 V and 1.8 V initial voltage, plotted using (a) logarithmic and (b) square root normalised time axes.

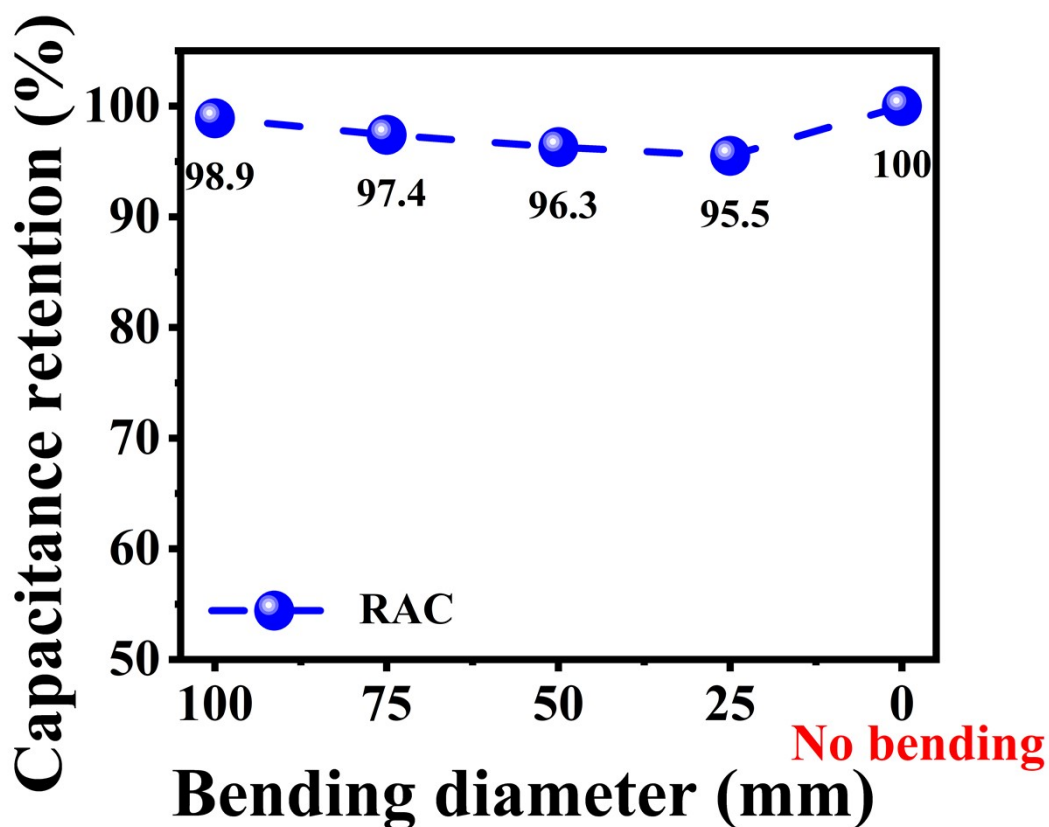

Fig. S7. Retention of capacitance performance during different bending states.
